# Supplementary material for: Synthesis of Ni–Co bimetallic catalyst with high activity and coking resistance for simulated biogas dry reforming in a constant alkaline chemical environment
Source: Royal Society of Chemistry journal article supplement (doi:10.1039/d5nj00193e), 2025-01-01
Supplement: d5nj00193e1.pdf [file d5nj00193e1.pdf]

## *Supporting information*

### Synthesis of Ni-Co Bimetallic Catalyst with High Activity and Coking Resistance for Simulated Biogas Dry Reforming in a Constant Alkaline Chemical Environment

Qixin Yang<sup>a</sup>, Jing Di<sup>a</sup>, Yin Li<sup>c</sup>, Mengxuan Zhai<sup>a</sup>, Haoquan Liang<sup>a</sup>, Zengkun Wang<sup>a</sup>, Qiongqiong Kan<sup>a</sup>, Yuanyu Tian<sup>b</sup>, Yingyun Qiao<sup>b</sup>, Ruiqin Yang<sup>a</sup>, Xikun Gai<sup>a\*</sup>

<sup>a</sup>*School of Biological and Chemical Engineering, Zhejiang University of Science and Technology, Hangzhou, Zhejiang 310023, China*

<sup>b</sup>*State Key Laboratory of Heavy Oil Processing, China University of Petroleum (East China), Qingdao, Shandong 266580, China*

<sup>c</sup>*Ecology and Health Institute, Hangzhou Vocational & Technical College, Hangzhou 310018, Zhejiang, China*

## 1. Supplementary Figures

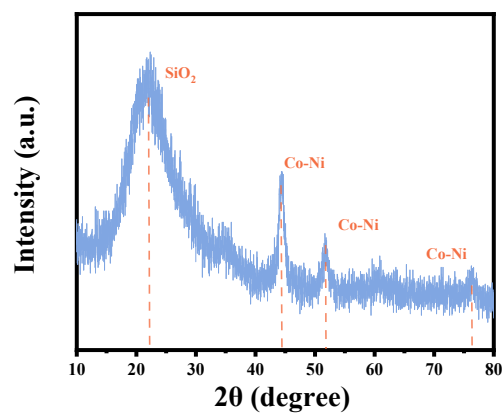

Fig S1. The characterizations of fresh catalysts: XRD patterns of 8Ni<sub>2</sub>Co/NH<sub>3</sub>-SiO<sub>2</sub> catalysts after hydrogen reduction<sup>1</sup>.

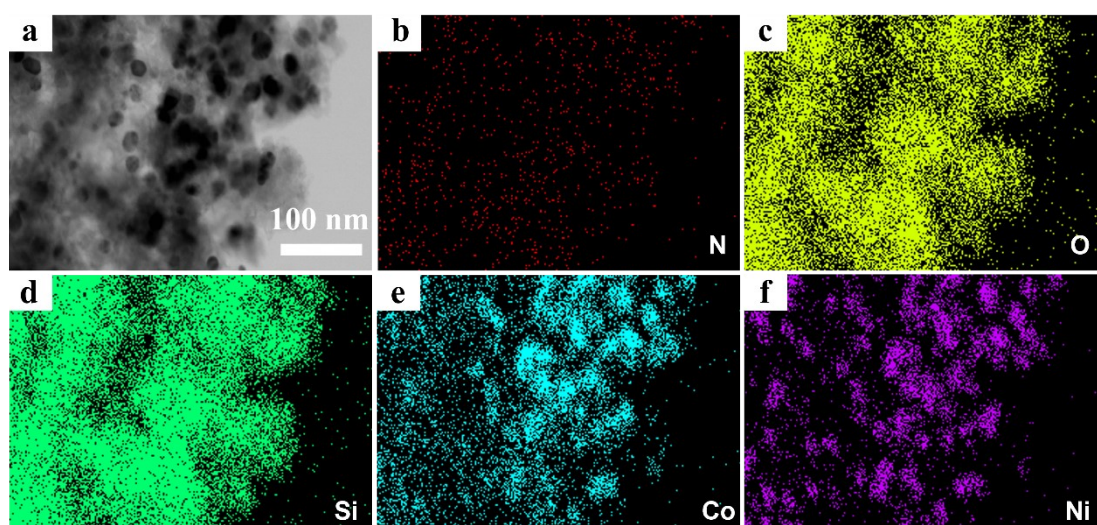

Fig S2. TEM image of the 8Ni<sub>2</sub>Co/NH<sub>3</sub>-SiO<sub>2</sub> catalyst (a) and EDS elemental maps of N, O, Si, Co and Ni in 8Ni<sub>2</sub>Co/NH<sub>3</sub>-SiO<sub>2</sub> catalyst after hydrogen reduction (b-f)<sup>2</sup>.
